# Supplementary material for: Thyroid redox imbalance in adult Wistar rats that were exposed to nicotine during breastfeeding
Source: PubMed Central journal article supplement (PMC7519108; doi:10.1038/s41598-020-72725-w), 2020-09-24

# Thyroid redox imbalance in adult Wistar rats that were exposed to nicotine during breastfeeding

Rosiane Aparecida Miranda<sup>1</sup>, Egberto Gaspar de Moura<sup>1</sup>, Patrícia Novaes Soares<sup>1</sup>, Thamara Cherem Peixoto<sup>1</sup>, Bruna Pereira Lopes<sup>1</sup>, Cherley Borba Vieira de Andrade<sup>2</sup>, Elaine de Oliveira<sup>1</sup>, Alex C. Manhães<sup>3</sup>, Caroline Coelho de Faria<sup>2</sup>, Rodrigo Soares Fortunato<sup>2</sup>, Patricia Cristina Lisboa<sup>1\*</sup>

<sup>1</sup>Laboratory of Endocrine Physiology, Biology Institute, Rio de Janeiro State University, RJ, Brazil; <sup>2</sup>Carlos Chagas Filho Biophysics Institute, Federal University of Rio de Janeiro, Rio de Janeiro, Brazil; <sup>3</sup>Laboratory of Neurophysiology, Biology Institute, Rio de Janeiro State University, RJ, Brazil.

## Western blotting images

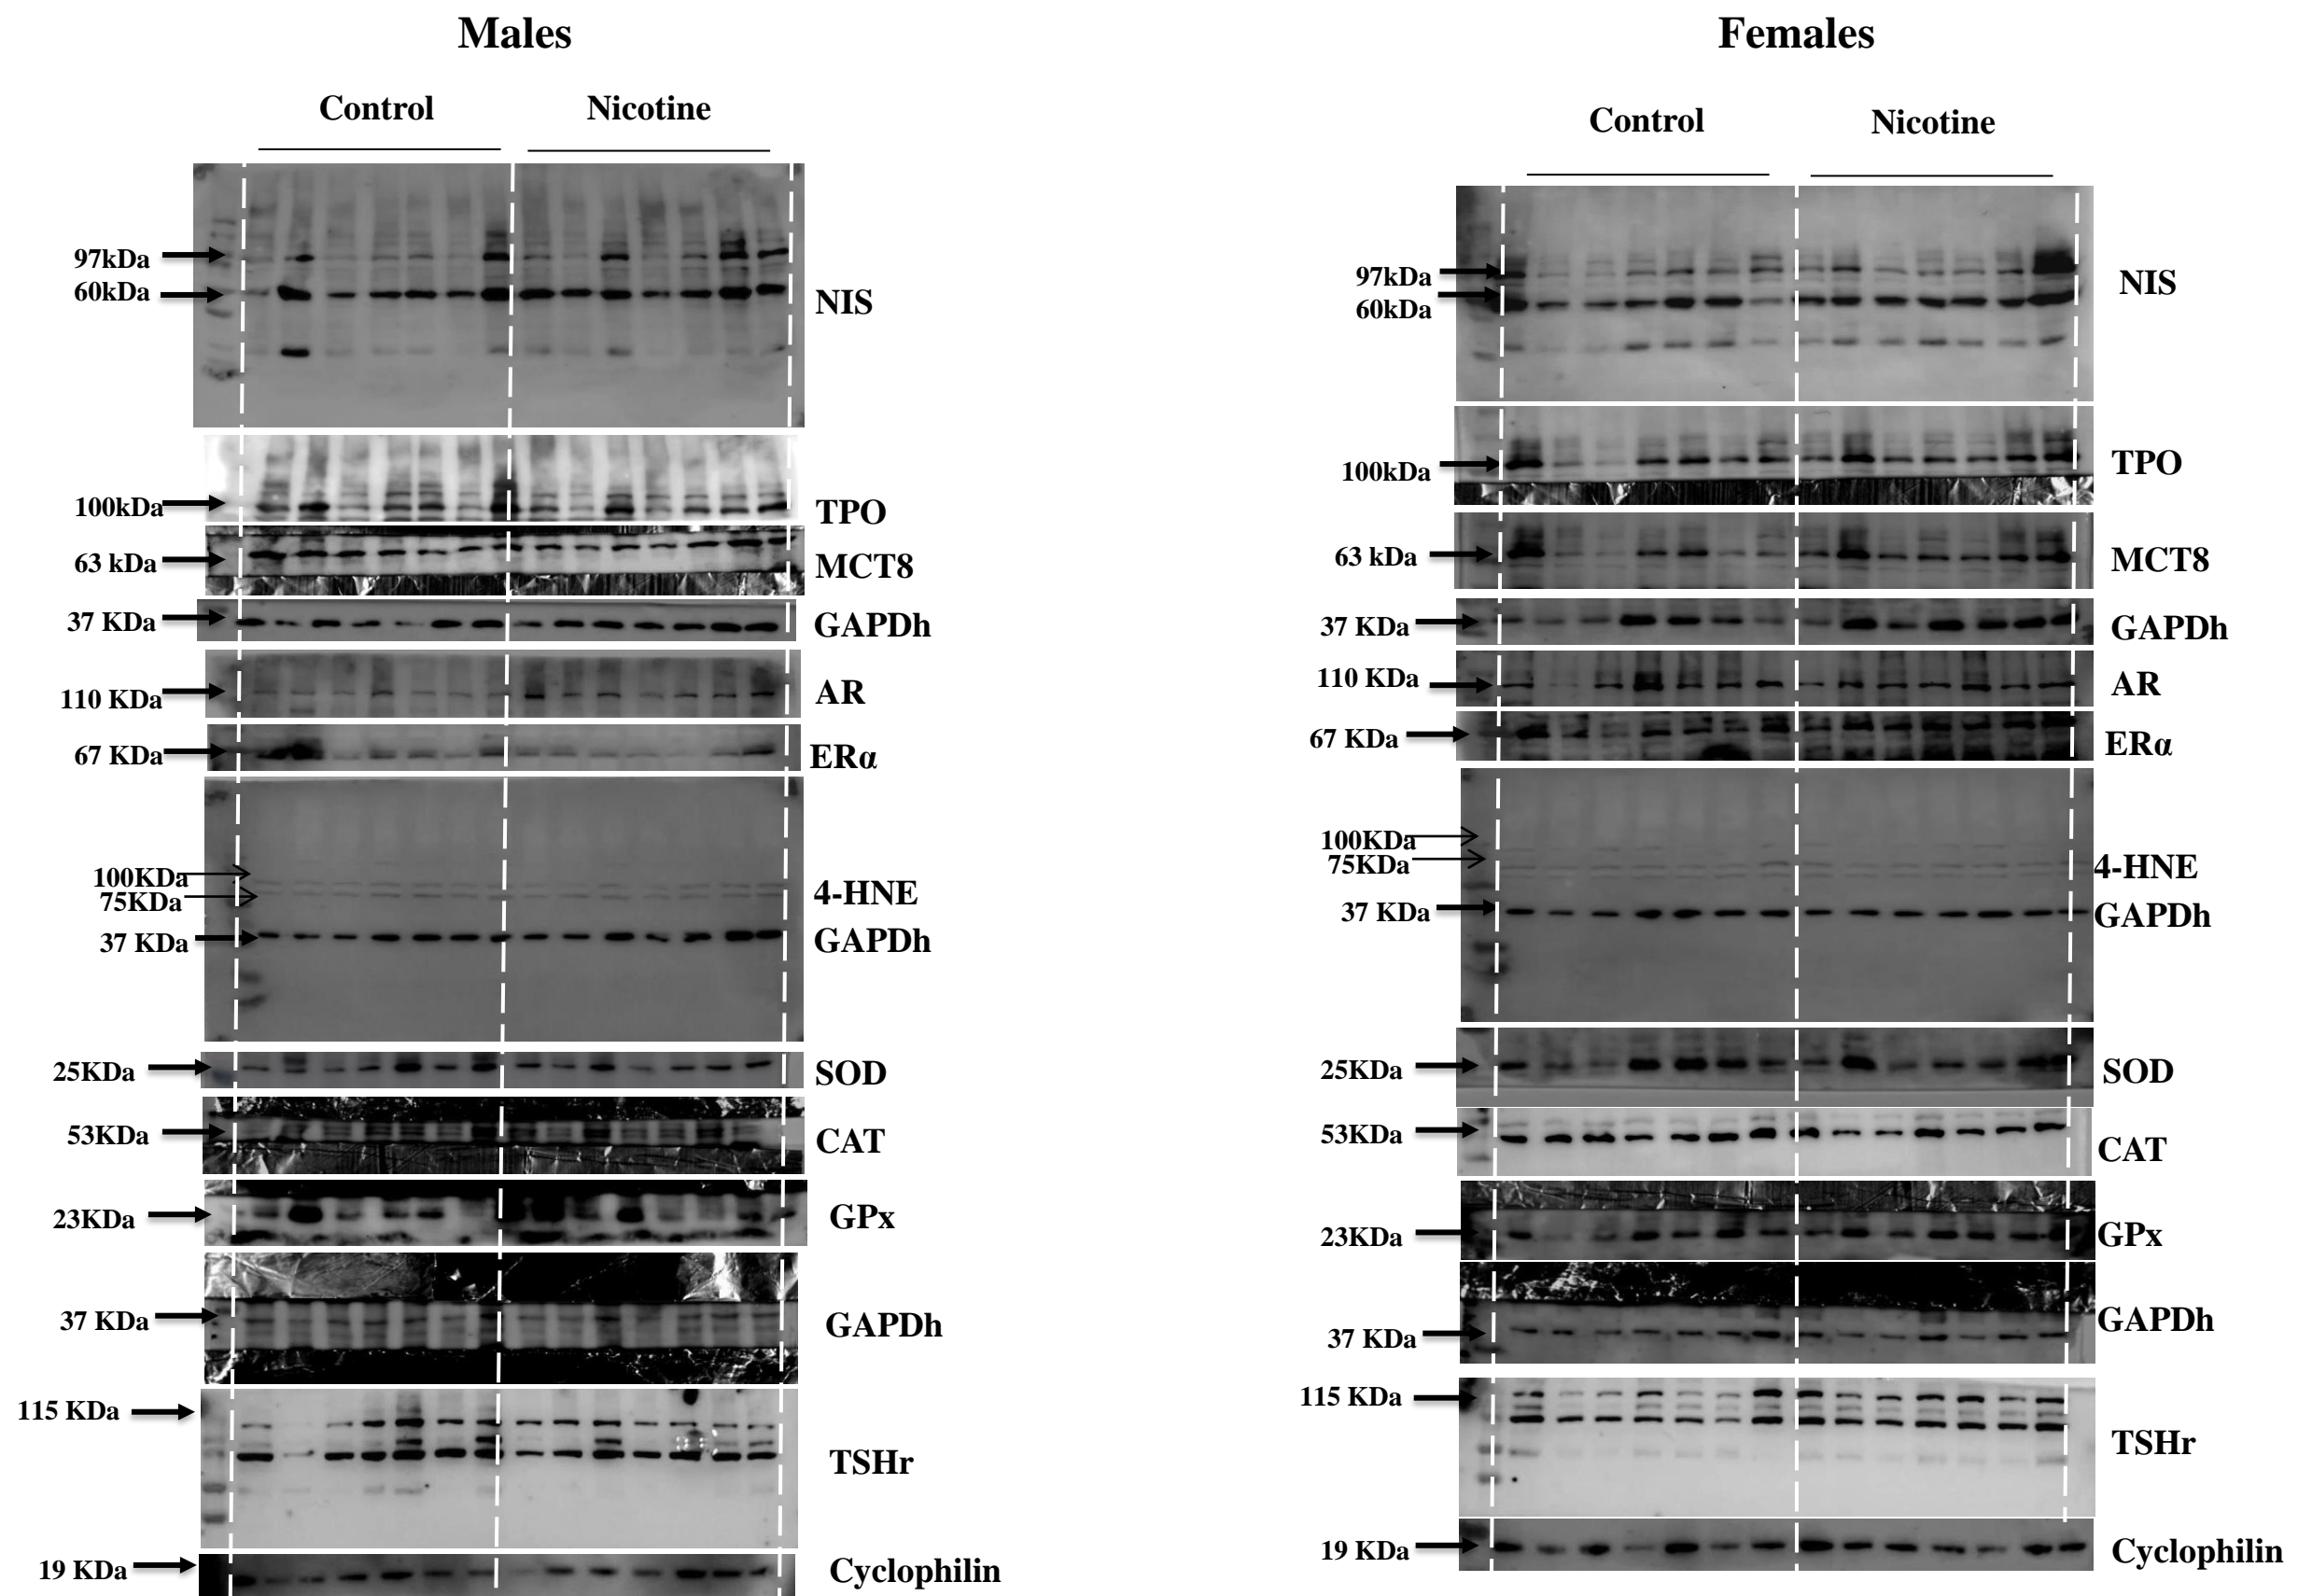

Supplement: 41598_2020_72725_MOESM1_ESM.pdf [file 41598_2020_72725_MOESM1_ESM.pdf]
